# Supplementary material
Source: MDPI journal article supplement (https://www.mdpi.com/2075-163X/13/4/573)
Supplement: s1 [file s1]

**Table S1.** Melt and fluid inclusion data of carbonatite complexes of the Central Asian province (Russian Siberia and South Mongolia)

| Carbonatite complex                    | Carbonatite / silicate rock  | Host mineral                                | Type of inclusion                                                     | Thom. inclusion, °C                                     | P, MPa               | Total salt concentration, wt. %                                       | Daughter-phases and inclusions composition*                                                                                                                                                                          | Mineral assemblages                                                                                                                                                                               |
|----------------------------------------|------------------------------|---------------------------------------------|-----------------------------------------------------------------------|---------------------------------------------------------|----------------------|-----------------------------------------------------------------------|----------------------------------------------------------------------------------------------------------------------------------------------------------------------------------------------------------------------|---------------------------------------------------------------------------------------------------------------------------------------------------------------------------------------------------|
| Western Transbaikalia**<br><br>Khaluta | Shonkinite, alkaline syenite | Titanite<br>Clinopyroxene<br><br>K-feldspar | Melt<br>Silicate, and salt-silicate                                   | 780-800<br>Immiscibility                                | ---                  | 95 - 97                                                               | Cpx, Kfs, Phl, Cal, Anh, Ba-Clt, mss, CO <sub>2</sub> ; Ab, Ba-Clt                                                                                                                                                   | Potash feldspar, aegerine-diopside and amphiboles, phlogopite, apatite, titanite, albite, calcite, celestine, and zircon and allanite                                                             |
| Yuzhnoe                                | Carbonatites REE             | Magnetite<br>Bastnaesite-(Ce)<br>Fluorite   | Melt carbonate-sulphate<br>Brine-melt<br><br>Crystal-fluid            | > 480 - 520<br><br>360 - 470<br><br>110 - 165           | 280-300<br><br>< 250 | > 80<br>60 - 74 (54-68 – sulphates)<br>43 – 56<br>-< 15               | Cal, Str, alkaline (Na-Ca) carbonates and Ba-Clt; Anh, Ba-Clt, Thn, Acn, and Att; Na-K-carbonates; Na-Sr sulfates, Na ± Ca carbonates and chlorides CO <sub>2</sub> -H <sub>2</sub>                                  | Calcite, fluorite, bastnaesite-(Ce), biotite<br><br>Barite, fluorite, calcite, celestite                                                                                                          |
| Arshan                                 | Carbonatites REE-Ba-Sr       | Fluorite                                    | Brine-melt<br>Multiphase and two-phase                                | 420-560<br><br>90-150                                   | ---                  | 50-67 (46-55 – sulphates)<br><br>12-14                                | Na ± Ca ± Sr sulfates and Na-Sr carbonates<br>CO <sub>2</sub> ± N <sub>2</sub> ± H <sub>2</sub>                                                                                                                      | Calcite, barytocelestite, and fluorite<br>Calcite, bastnaesite-(Ce), fluorite                                                                                                                     |
| Ulan-Ude (Portovoe)                    | Carbonatites F-REE           | Bastnaesite-(Ce)<br>Fluorite                | Brine-melt<br><br>Crystal-fluid<br><br>(primary and pseudo-secondary) | >> 490 - 520<br><br>440-520<br>370-400<br><br>135 - 250 | > 310                | > 65<br>52 - 62.5 (54-68 – sulphates)<br><br>38 – 42<br><br>14.5 - 16 | Ten, Glb, REE-, and Na-Ca-carbonates; Ca-Na-REE carbonates, Na-Sr sulfates and chlorides, CO <sub>2</sub> (L); Chlorides and hydrocarbonates of Na, K, and Ca, and CO <sub>2</sub> ± N <sub>2</sub> ± H <sub>2</sub> | Fluorite, bastnaesite-(Ce), monazite-(Ce), albite, and K-feldspar, zircon, Nb-rutile, ilmenite; glaukophane, plumbogummite, monazite-(Ce), corkite. Fluorite, bastnaesite-(Ce), calcite, siderite |

|                                         |                                                                       |                        |                                |         |          |                                                              |                                                                                                                   |                                                                                                                                      |
|-----------------------------------------|-----------------------------------------------------------------------|------------------------|--------------------------------|---------|----------|--------------------------------------------------------------|-------------------------------------------------------------------------------------------------------------------|--------------------------------------------------------------------------------------------------------------------------------------|
|                                         |                                                                       |                        | Fluid gas-liq                  |         |          |                                                              |                                                                                                                   |                                                                                                                                      |
| <b>Central Tuva<br/>carbonatites***</b> | Ankerite-<br>calcite (first<br>phase of<br>carbonatite<br>intrusions) | Quartz                 | Melt<br>carbonate              | 790-820 | >> 350   | 97 - 99                                                      | Ank, Cal, CO <sub>2</sub>                                                                                         | Calcite, ankerite,<br>phlogopite, fluorapatite,<br>Ti-magnetite, quartz,<br>and muscovite                                            |
|                                         |                                                                       | Apatite,<br>phlogopite | Melt<br>Silicate-<br>carbonate | >> 500  |          | Silicates - 50-<br>70 vol.%;<br>carbonates –<br>30-50 vol.%  | Silicate phase (Phl?):<br>Si, Al, Ca, Na, K, Fe,<br>Mg, Ti, O, Cl, OH<br>Ank: Ca, Fe, Mg, Sr,<br>CO <sub>2</sub>  |                                                                                                                                      |
|                                         |                                                                       | Fluorite               | Brine-melt                     | 620-650 | 340 –350 | ~ 87.5-95<br>Carbonates –<br>10-50;<br>chlorides - 40-<br>75 | HI, Syl, Cal, Ank,<br>CO <sub>2</sub> (L)                                                                         |                                                                                                                                      |
| Karasug***                              |                                                                       |                        | Brine-melt                     | 610-650 |          | > 80                                                         | Ca, Na, K, Mg, Fe,<br>Ba, Sr - silicates,<br>carbonates,<br>chlorides, fluorides,<br>sulphates and<br>bastnaesite | Calcite, fluorapatite, Ti-<br>magnetite, quartz,<br>muscovite, fluorite,<br>monazite-(Ce),<br>bastnaesite-(Ce)                       |
| Ulatai-Choza                            |                                                                       |                        |                                |         |          |                                                              |                                                                                                                   |                                                                                                                                      |
| Karasug***                              | Siderite Fe-F-<br>REE (second<br>phase)                               | Quartz                 | Brine-melt                     | 580-640 | 290-330  | 87 – 92<br>NaCl - 45-48<br>KCl - 32-30                       | HI, Syl, Sd, Anh,<br>ancylite-Ce<br>Fe-copiapite-CO <sub>2</sub> (L)                                              | Siderite, calcite, fluorite,<br>quartz, barite, Ba-<br>celestite, bastnaesite-<br>(Ce), fluorapatite,<br>muscovite, and<br>magnetite |
| Ulatai-Choza***                         |                                                                       | Fluorite               |                                | >> 500  | 320-350  | Siderite 10-15<br>75 – 77<br>NaCl - 42-47<br>KCl - 28-30     | HI, Syl, Sd, Bsn-(Ce),<br>Silicates, Brt-Clt -<br>CO <sub>2</sub> (L)                                             |                                                                                                                                      |

|                                             |                                                                     |                     |                                                            |                        |         |                                                           |                                                                                                                                                                                                                      |                                                                                                                                                                                                         |
|---------------------------------------------|---------------------------------------------------------------------|---------------------|------------------------------------------------------------|------------------------|---------|-----------------------------------------------------------|----------------------------------------------------------------------------------------------------------------------------------------------------------------------------------------------------------------------|---------------------------------------------------------------------------------------------------------------------------------------------------------------------------------------------------------|
| Karasug                                     | Siderite                                                            | Quartz,<br>fluorite | Crystal-<br>fluid<br>(primary<br>and pseudo-<br>secondary) | 420-480                | 200-250 | 40 – 60<br>KCl - 30-45<br>NaCl - 10-15<br>Sulphates - 2-5 | Hl, Syl, Anh,<br>Br <sub>2</sub> -Cl <sub>2</sub> , Thn,<br>Bst-(Ce) -CO <sub>2</sub> (L)                                                                                                                            | Siderite, calcite,<br>dolomite, fluorite,<br>quartz, barite, Ba-<br>celestite, bastnaesite-<br>(Ce), parisite-(Ce),<br>synshysite-(Ce),<br>xenotime-(Y),<br>fluorapatite,<br>strontianite, and sericite |
| Ulatai-Choza                                | Ankerite-<br>calcite, siderite                                      | Fluorite<br>quartz  |                                                            | 300-380                | 180-230 | 30 – 40<br>NaCl - 10-25<br>KCl - 30-15                    |                                                                                                                                                                                                                      |                                                                                                                                                                                                         |
|                                             | Ankerite-<br>calcite                                                | Quartz              | Multiphase<br>and two-<br>phase                            | 250-300                | 50-75   | 15 - 30<br>NaCl –eq.                                      | H <sub>2</sub> O- NaCl/KCl -<br>CO <sub>2</sub> (G/L)                                                                                                                                                                | Quartz, calcite, fluorite,<br>etc.                                                                                                                                                                      |
| <b>Mushugai-<br/>Khudag<br/>complex****</b> | Magnetite-<br>apatite<br>rocks****                                  | Fluorapatite        | Melt****                                                   | 830-850                | 320-340 | 89 – 97                                                   | Na-Amp, Anh, Br <sub>2</sub> -<br>Cl <sub>2</sub> , Mn <sub>2</sub> -(Ce), Hem<br>- CO <sub>2</sub> (L)                                                                                                              | Magnetite, fluorapatite,<br>ilmenite, phlogopite                                                                                                                                                        |
|                                             |                                                                     |                     | Brine-<br>melt****                                         | 500-580                |         |                                                           |                                                                                                                                                                                                                      |                                                                                                                                                                                                         |
|                                             |                                                                     |                     | Crystal-<br>fluid                                          | 400-380<br>250-150     | ---     | 45 – 60<br>10 - 20                                        | Hl/Syl, Anh, Br <sub>2</sub> -Cl <sub>2</sub> ,<br>Mn <sub>2</sub> -(Ce), Hem -<br>CO <sub>2</sub> (L)                                                                                                               | Monazite-Ce, celestite,<br>rutile, quartz, fluellite,<br>fluorite, barite, gypsum,<br>and phosphosiderite                                                                                               |
|                                             | Calcite-fluorite<br>rocks                                           | Fluorite****        | Brine-melt                                                 | 500-530                | ---     | 52 - 64                                                   | Hl/Syl, Ank, Br <sub>2</sub> -Cl <sub>2</sub> ,<br>Thn, Cal, Mag, Bst-<br>(Ce), Sgn -CO <sub>2</sub> (L)                                                                                                             | Magnetite, calcite,<br>apatite, fluorite, barite,<br>celestite                                                                                                                                          |
|                                             | Late-stage<br>quartz-<br>carbonate-<br>celestite-<br>fluorite rocks | Fluorite            | Crystal-<br>fluid                                          | 470-390<br><br>295-250 | ----    | 38 – 46<br><br>13.9 – 6.5                                 | Hl/Syl, Cal, Bst-(ce),<br>Br <sub>2</sub> -Cl <sub>2</sub> , Anh, -<br>CO <sub>2</sub> (L)<br><br>Hl/Syl, Cal, Bst-(ce),<br>Br <sub>2</sub> -Cl <sub>2</sub> , Anh, Str, P-<br>Sid - CO <sub>2</sub> ±H <sub>2</sub> | Quartz, fluorite, calcite,<br>barite, celestite,<br>pyrolusite, bastnaesite-<br>(Ce), monazite-(Ce),<br>ilmenite, rutile, siderite<br>and phosphosiderite                                               |

Notes: T<sub>m</sub> – melting temperature of the salt component; T<sub>hom</sub> - homogenisation temperature of inclusion; cr. ph - crystalline phase; "---" - parameter is not detected, \* - the composition of the crystalline phase indicated by Raman spectroscopy and SEM-EPMA analyses; \*\* - our previous [50-52,54,56] and present data; \*\*\* - our previous [40] and present data. \*\*\*\* - our previous [49,59] and present data. Abbreviations of mineral phases according to [55].

**Table S2.** LA-ICP MS elemental concentrations in the brine-melt inclusions in the carbonatites of the Central Asian province

| Province Areal      | Central Tuva     |                      |             |              | Western Transbaikalia |                       | Mushugai-Khudak complex    |                           |
|---------------------|------------------|----------------------|-------------|--------------|-----------------------|-----------------------|----------------------------|---------------------------|
| Complexes           | Ulatai-Choza*    | Karasug*             |             | Ulatai-Choza | Yuzhnoe               | Ulan-Ude              |                            |                           |
| Type of carbonatite | Ankerite-calcite | Fe-F-REE<br>Siderite |             |              | REE<br>Calcite        | F-REE<br>Carbonatites | Magnetite-apatite<br>rocks | Calcite-fluorite<br>rocks |
| Mineral<br>Element  | Quartz           | Quartz               | Fluorite    | Quartz       | Fluorite              |                       | Fluorapatite               | Fluorite                  |
| Na, wt%             | 7.5 - 15         | 17 – 18              | 13.4 – 13.6 | 5 – 10       | 15 – 20               | 10 – 22               | 10 – 15                    | 10 – 22                   |
| K, wt%              | 8.1 - 12.2       | 14 - 15              | 5.4 – 7.1   | 12 – 15      | 10 - 15               | 10 - 12               | 5 - 10                     | 10 - 12                   |
| Fe, wt%             | 0.25 - 6         | 5 - 6                | 3.6         | 6.2 - 7.8    | 5.2 – 10.1            | 8.2 – 15.6            | 10.2 – 15.5                | 9.9 – 10.4                |
| Mn, wt%             | 0.13 – 1.1       | 0.65 – 1.1           | 0.045 – 0.3 | 0.48 – 1.1   | 0.5 – 1.5             | 0.5 – 1.1             | 0.5 – 1.5                  | 0.5 – 1.2                 |
| Ca, wt%             | 12.7 – 15.6      | 0.01–0.32            | 0.013 – 0.1 | 0.8 – 1.2    | 10.5 – 25             | 15 – 20               | 5 – 10                     | 15 – 20                   |
| Sr, wt%             | ---              | 0.28 – 0.7           | 0.43 – 2.7  | 0.88 – 2.66  | 5.5 – 12.1            | 5.5 – 12.1            | 5 – 16.2                   | 12.5 – 15.1               |
| Ba, wt%             | ---              | 0.2 – 0.8            | 0.01 – 1.2  | 0.32 – 1.18  | 1.3 – 2.65            | 0.3 – 0.65            | 0.5 – 0.55                 | 0.5 – 0.65                |
| La, ppm             | 4-5              | 30 - 60              | 460–1400    | 380 – 1565   | 2540 - 6550           | 3040 - 8550           | 2540 - 5650                | 3050 - 9550               |
| Ce, ppm             | 880-1100         | 15 – 70              | 2200 - 4700 | 2548 – 3988  | 3280 – 9520           | 4250 – 10520          | 4550 – 7500                | 4450 – 9550               |
| Nd, ppm             | ---              | 20 - 30              | 450 - 4450  | 305 – 2680   | 3520 – 7500           | 4020 – 7800           | 3020 – 5500                | 4050 – 8800               |
| Y, ppm              | ---              | 0.15 - 6             | ---         | 250 – 1520   | 580 – 1050            | 550 – 1020            | 250 – 520                  | 580 – 1050                |
| Th, ppm             | ---              | 0.3 - 28             | 0.2–0.6     | 0.5 – 10     | 0.5 - 10              | 0.5 - 50              | 0.5 - 10                   | 0.5 - 30                  |
| U, ppm              | ---              | 2.5 - 35             | 10-35       | 10 - 30      | 10 - 50               | 10 - 50               | 10 - 20                    | 10 - 25                   |

\* - our previous data [40] and present data. The LA-ICP MS method was used to analyze 38 inclusions from the Central Tuva region, 27 inclusions from the West Transbaikalia region, and 36 inclusions from the rocks of the Mushugai-Khudak carbonatite complex.
